# Supplementary material for: Genetic targeting of myelinated primary afferent neurons using a new NefhCreERT2 knock-in mouse
Source: Springer Nature journal article supplement (doi:10.1038/s41598-025-95874-2), 2025-03-29
Supplement: MOESM1 [file 41598_2025_95874_MOESM1_ESM.pdf]

## Supplementary information

### **Genetic targeting of myelinated primary afferent neurons using a new Nefh<sup>CreERT2</sup> knock-in mouse**

John CY Chen<sup>1</sup>, Lech Kaczmarczyk<sup>1</sup>, Felipe Meira de Faria<sup>2</sup>, Marcin Szczot<sup>2</sup>, Walker S Jackson<sup>1</sup>,  
Max Larsson<sup>1,\*</sup>

<sup>1</sup>Department of Biomedical and Clinical Sciences, Division of Cell- and Neurobiology, Linköping University, S-581 85 Linköping, Sweden

<sup>2</sup>Department of Biomedical and Clinical Sciences, Center for Social and Affective Neuroscience, Linköping University, S-581 85 Linköping, Sweden

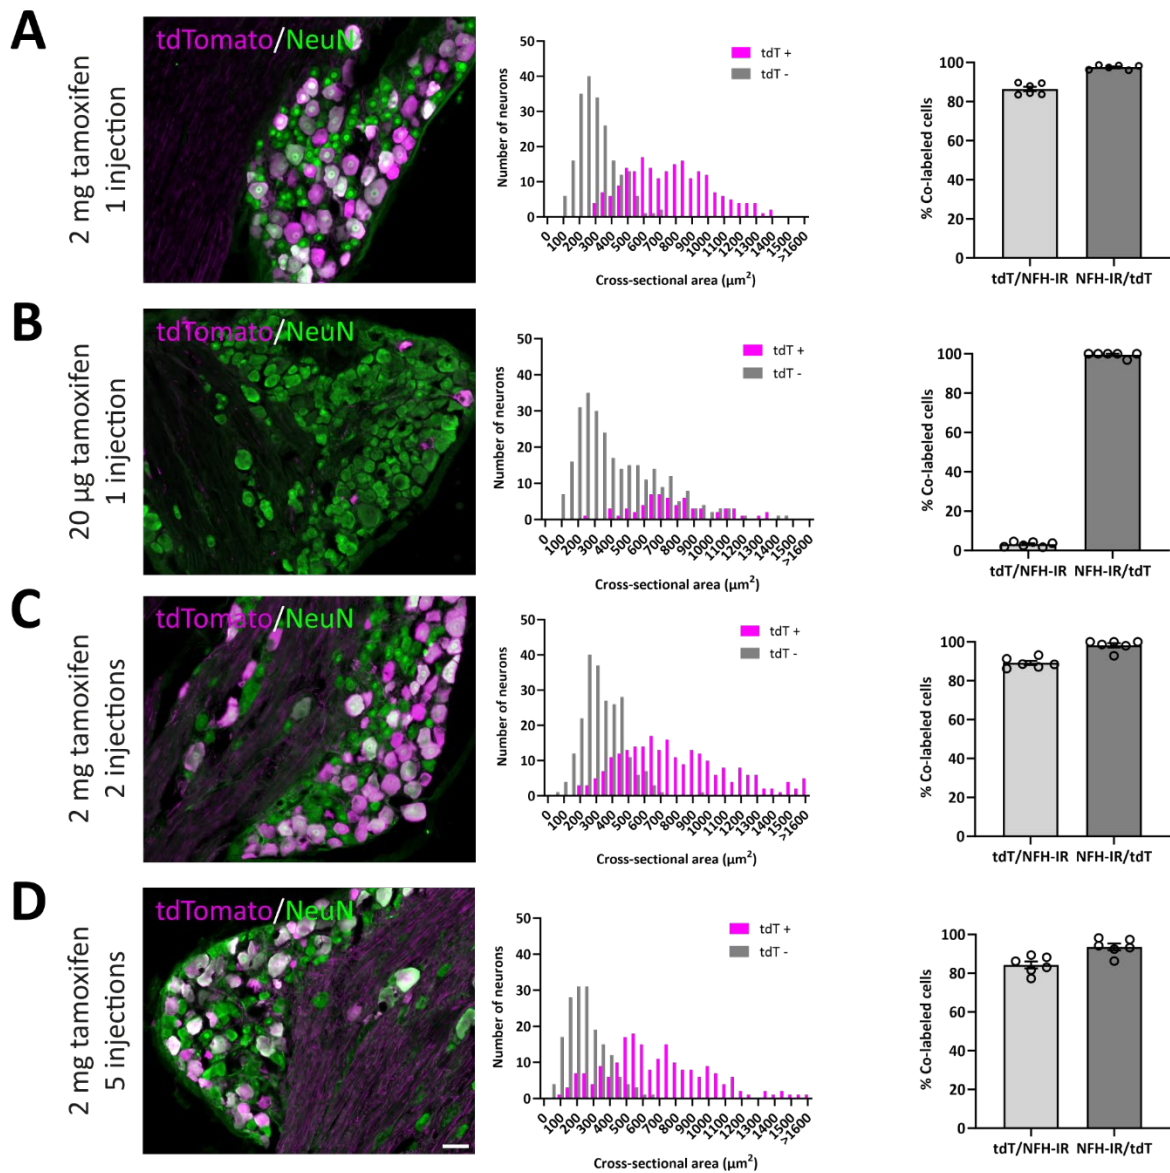

**Figure S1.** Soma size and recombination efficiency in lumbar DRGs after different tamoxifen administration regimes. **A**, a single low-dose (20  $\mu$ g) tamoxifen injection. **B-D**, one (B), two (C) or five (D) injections of 2 mg tamoxifen. Left panels, representative images of DRGs showing tdTomato expression among NeuN immunoreactive neurons. Middle panels, size distributions of tdTomato<sup>+</sup> and tdTomato<sup>-</sup> DRG neurons. Right panels, recombination efficiency (mean  $\pm$  S.E.M). with respect to NFH-IR. n=3 mice. Scale bar in D is 50  $\mu$ m, valid for all panels.
